# Supplementary material
Source: PubMed Central journal article supplement (PMC6563560)
Supplement: jamainternmed-179-1113-s002.pdf [file jamainternmed-179-1113-s002.pdf]

## Supplementary Online Content

Federman AD, O'Connor R, Mindlis I, et al. Effect of a self-management support intervention on asthma outcomes in older adults: the SAMBA study randomized clinical trial [published online June 10, 2019]. *JAMA Intern Med*. doi:10.1001/jamainternmed.2019.1201

**eTable 1.** Subgroup Analysis of Intervention Patients: Differences in Asthma Outcomes Within and Between Home- and Clinic-based Arms

**eTable 2.** Subgroup Analysis of Intervention Patients: Heterogeneity of Treatment Effects for Individuals with Cognitive Impairment, Physical Impairment, or Depression

**eTable 3.** Screening and Follow-up Performance of the Intervention, Overall and by Study Site

**eFigure.** Asthma Control, Asthma Quality of Life, and Medication Adherence Over Time, Intervention vs. Control

This supplementary material has been provided by the authors to give readers additional information about their work.

**eTable 1. Subgroup Analysis of Intervention Patients: Differences in Asthma Outcomes Within and Between Home- and Clinic-based Arms**

|                                                                   | Home-based Intervention |                   |       | Clinic-based Intervention |                   |       | Home Effect            |     |
|-------------------------------------------------------------------|-------------------------|-------------------|-------|---------------------------|-------------------|-------|------------------------|-----|
|                                                                   | Value                   | Δ (95% CI)*       | P*    | Value                     | Δ (95% CI)*       | P*    | DiD (95% CI)*          | P*  |
| <b>Asthma Control Test score, mean (sd)</b>                       |                         |                   |       |                           |                   |       |                        |     |
| Baseline                                                          | 15.0 (3.8)              | -                 | -     | 14.6 (4.0)                | -                 | -     | -                      | -   |
| 3 months                                                          | 16.6 (4.4)              | 1.6 (0.8, 2.4)    | <.001 | 15.7 (4.4)                | 1.2 (0.3, 2.1)    | .003  | 0.5 (-1.6, 0.5)        | .35 |
| 6 months                                                          | 16.8 (4.3)              | 1.6 (0.7, 2.5)    | <.001 | 15.8 (4.4)                | 1.2 (0.3, 2.1)    | .02   | 0.1 (-1.2, 1.0)        | .87 |
| 12 months                                                         | 17.4 (4.8)              | 2.5 (1.5, 3.4)    | <.001 | 16.9 (4.7)                | 1.9 (0.8, 3.0)    | <.001 | 0.3 (-1.5, 1.0)        | .68 |
| Overall effect†                                                   |                         |                   |       |                           |                   |       | χ <sup>2</sup> (4)=3.2 | .52 |
| <b>Mini-Asthma Quality of Life score, mean (sd)</b>               |                         |                   |       |                           |                   |       |                        |     |
| Baseline                                                          | 4.4 (1.2)               | -                 | -     | 4.4 (1.2)                 | -                 | -     | -                      | -   |
| 3 months                                                          | 4.8 (1.8)               | 0.5 (0.3, 0.7)    | <.001 | 4.6 (1.2)                 | 0.3 (0.0, 0.5)    | .03   | 0.2 (-0.2, 0.6)        | .31 |
| 6 months                                                          | 4.9 (1.2)               | 0.5 (0.2, 0.7)    | <.001 | 4.5 (1.4)                 | 0.1 (-0.1, 0.4)   | .66   | 0.4 (0.1, 0.8)         | .02 |
| 12 months                                                         | 4.9 (1.3)               | 0.6 (0.4, 0.8)    | <.001 | 4.8 (1.4)                 | 0.3 (0.1, 0.6)    | .01   | 0.2 (-0.2, 0.5)        | .29 |
| Overall effect†                                                   |                         |                   |       |                           |                   |       | χ <sup>2</sup> (4)=6.7 | .15 |
| <b>Medication Adherence Rating Scale score, mean (sd)</b>         |                         |                   |       |                           |                   |       |                        |     |
| Baseline                                                          | 3.6 (0.7)               | -                 | -     | 3.7 (0.6)                 | -                 | -     | -                      | -   |
| 3 months                                                          | 3.9 (0.6)               | 0.3 (0.2, 0.5)    | <.001 | 3.9 (0.6)                 | 0.2 (0.0, 0.4)    | .003  | 0.1 (-0.2, 0.3)        | .58 |
| 6 months                                                          | 3.9 (0.7)               | 0.3 (0.1, 0.5)    | .003  | 4.0 (0.7)                 | 0.3 (0.1, 0.4)    | <.001 | -0.1 (-0.3, 0.2)       | .51 |
| 12 months                                                         | 3.8 (0.8)               | 0.2 (0.0, 0.4)    | .01   | 4.0 (0.7)                 | 0.4 (0.2, 0.5)    | <.001 | -0.1 (-0.4, 0.2)       | .44 |
| Overall effect†                                                   |                         |                   |       |                           |                   |       | χ <sup>2</sup> (4)=2.7 | .62 |
| <b>MDI technique, % correctly completed steps, median (range)</b> |                         |                   |       |                           |                   |       |                        |     |
| Baseline                                                          | 62.8 (53.0, 74.4)       | -                 | -     | 60.1 (50.9, 70.9)         | -                 | -     | -                      | -   |
| 12 months                                                         | 71.5 (59.6, 85.8)       | -8.7 (-25.5, 8.1) | .31   | 60.6 (50.4, 72.7)         | 0.4 (-15.3, 14.4) | .95   | 1.0 (0.9, 1.2)         | .71 |
| Overall effect†                                                   |                         |                   |       |                           |                   |       | χ <sup>2</sup> (2)=0.4 | .82 |
| <b>≥1 Emergency department visit, %</b>                           |                         |                   |       |                           |                   |       |                        |     |
| Baseline                                                          | 13.1%                   |                   |       | 9.3%                      |                   |       |                        | -   |
| 12 months                                                         | 7.7%                    | 0.7 (0.5, 1.0)‡   | .03   | 6.2%                      | 0.9 (0.7, 1.2)‡   | .70   | 1.3 (0.8, 2.0)§        | .31 |

\*Change within study arm relative to baseline.

†Effect over all time points.

‡Odds ratio (95% confidence interval).

DiD, difference-in-differences.

4  
5  
6  
7  
8

**eTable 2. Subgroup Analysis of Intervention Patients: Heterogeneity of Treatment Effects for Individuals with Cognitive Impairment, Physical Impairment, or Depression**

|                                                                   | Physical Impairment  |            |            |            |              |              | Model Effect P |
|-------------------------------------------------------------------|----------------------|------------|------------|------------|--------------|--------------|----------------|
|                                                                   | 3-Months             |            | 6-Months   |            | 12-Months    |              |                |
|                                                                   | Home                 | Clinic     | Home       | Clinic     | Home         | Clinic       |                |
| ACT, <i>mean (sd)</i>                                             | 16.1 (4.3)           | 15.3 (4.3) | 16.3 (4.2) | 15.0 (4.4) | 16.4 (4.7)   | 16.1 (4.7)   | .99            |
| mAQLQ, <i>mean (sd)</i>                                           | 4.6 (1.2)            | 4.4 (1.1)  | 4.7 (1.2)  | 4.2 (1.3)  | 4.7 (1.3)    | 4.6 (1.4)    | .57            |
| MARS, <i>mean (sd)</i>                                            | 3.9 (0.6)            | 3.9 (0.6)  | 3.9 (0.7)  | 3.9 (0.7)  | 3.9 (0.7)    | 4.0 (0.7)    | .81            |
| MDI technique, % correctly completed steps, <i>median (range)</i> |                      | -          | -          | -          | 83 (17, 100) | 67 (17, 100) | .46            |
| ≥1 ED visit, %                                                    | -                    | -          | -          | -          | 13.1         | 11.7         | .95            |
|                                                                   | Cognitive Impairment |            |            |            |              |              | Model Effect P |
|                                                                   | 3-Months             |            | 6-Months   |            | 12-Months    |              |                |
|                                                                   | Home                 | Clinic     | Home       | Clinic     | Home         | Clinic       |                |
| ACT, <i>mean (sd)</i>                                             | 16.1 (4.6)           | 14.8 (4.3) | 16.3 (4.4) | 15.6 (4.6) | 16.9 (4.9)   | 15.9 (4.9)   | .61            |
| mAQLQ, <i>mean (sd)</i>                                           | 4.7 (1.1)            | 4.4 (1.2)  | 4.8 (1.2)  | 4.3 (1.4)  | 4.5 (1.3)    | 4.5 (1.4)    | .43            |
| MARS, <i>mean (sd)</i>                                            | 3.9 (0.5)            | 3.8 (0.6)  | 3.7 (0.7)  | 3.8 (0.7)  | 3.7 (0.7)    | 4.0 (0.6)    | .96            |
| MDI technique, % correctly completed steps, <i>median (range)</i> | -                    | -          | -          | -          | 58 (0, 100)  | 58 (0, 100)  | .32            |
| ≥1 ED visit, %                                                    | -                    | -          | -          | -          | 11.3         | 11.8         | .95            |
|                                                                   | Depression           |            |            |            |              |              | Model Effect P |
|                                                                   | 3-Months             |            | 6-Months   |            | 12-Months    |              |                |
|                                                                   | Home                 | Clinic     | Home       | Clinic     | Home         | Clinic       |                |
| ACT, <i>mean (sd)</i>                                             | 14.4 (4.2)           | 14.5 (3.7) | 15.7 (4.5) | 15.2 (4.1) | 15.6 (6.2)   | 16.0 (4.6)   | .96            |
| mAQLQ, <i>mean (sd)</i>                                           | 4.0 (1.1)            | 4.4 (1.1)  | 4.4 (1.3)  | 4.2 (1.4)  | 4.2 (1.7)    | 4.5 (1.5)    | .71            |
| MARS, <i>mean (sd)</i>                                            | 3.8 (0.6)            | 3.9 (0.4)  | 3.7 (0.8)  | 3.8 (0.7)  | 3.7 (0.7)    | 4.1 (0.6)    | .71            |
| MDI technique, % correctly completed steps, <i>median (range)</i> | -                    | -          | -          | -          | 71 (33, 92)  | 79 (33, 83)  | .85            |
| ≥1 ED visit, %                                                    | -                    | -          | -          | -          | 14.3         | 2.8          | .52            |

ACT, Asthma Control Test; mAQLQ, mini-Asthma Quality of Life Questionnaire; MARS, Medication Adherence Rating Scale; MDI, metered dose inhaler; ED, emergency department.

10

11

12

13

14  
15

**eTable 3. Screening and Follow-up Performance of the Intervention, Overall and by Study Site**

|                                | <b>Overall</b> | <b>Site 1</b> | <b>Site 2</b> | <b>Site 3</b> | <b>Site 4</b> | <b>Site 5</b> | <b>P</b> |
|--------------------------------|----------------|---------------|---------------|---------------|---------------|---------------|----------|
| Completed barrier screening, % | 93.2           | 93.9          | 84.6          | 94.1          | 100           | 80.5          | .55      |
| Follow-up encounters           |                |               |               |               |               |               |          |
| # In-person, <i>mean (sd)</i>  | 3.3 (2.6)      | 2.6 (2.1)     | 2.5 (2.1)     | 4.8 (3.5)     | 4.1 (2.2)     | 4.3 (1.8)     | .006     |
| # Telephone, <i>mean (sd)</i>  | 4.1 (3.7)      | 1.2 (0.4)     | 2.3 (1.0)     | 2.2 (1.5)     | 1.4 (0.7)     | 8.9 (3.8)     | <.001    |

16

17

18

19

504 **eFigure. Asthma Control, Asthma Quality of Life, and Medication Adherence Over Time,**  
505 **Intervention vs. Control**

506  
507 Overall effect, intervention vs. control: ACT,  $p=.01$ ; mAQLQ,  $p=.03$ ; MARS,  $p=.049$ .

508  
509 ACT, Asthma Control Test; mAQLQ, mini-Asthma Quality of Life Questionnaire; MARS,  
510 Medication Adherence Rating Scale.

511

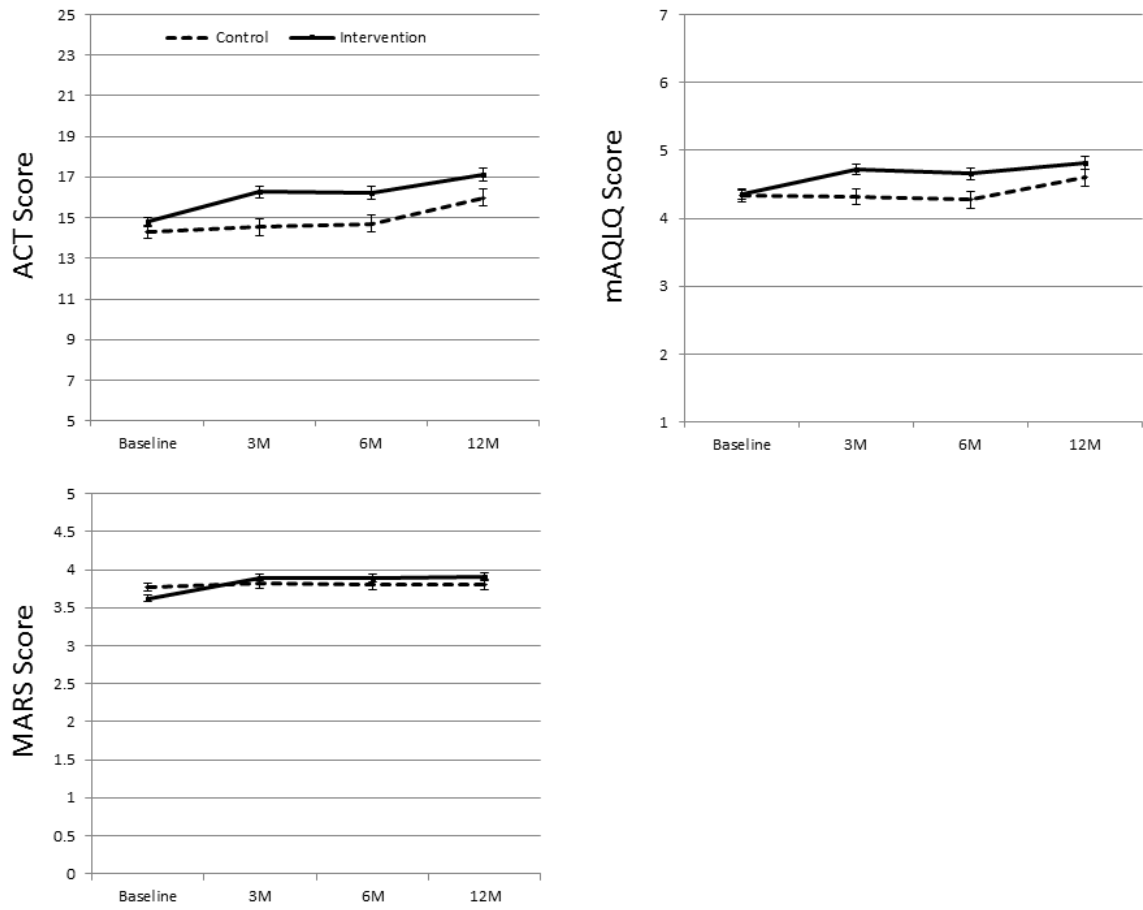

512
