# Supplementary material
Source: PubMed Central journal article supplement (PMC6563560)
Supplement: jamainternmed-179-1113-s003.pdf [file jamainternmed-179-1113-s003.pdf]

## Data Sharing Statement

Federman. Effect of a Self-Management Support Intervention on Asthma Outcomes in Older Adults. *JAMA Intern Med*. Published June 10, 2019. 10.1001/jamainternmed.2019.1201

### Data

**Data available:** Yes

**Data types:** Deidentified participant data

**How to access data:** Data available on request to [alex.federman@mssm.edu](mailto:alex.federman@mssm.edu)

**When available:** With publication

### Supporting Documents

**Document types:** Statistical/analytic code, Informed consent form

**How to access documents:** Documentation available on request to [alex.federman@mssm.edu](mailto:alex.federman@mssm.edu)

**When available:** With publication

### Additional Information

**Who can access the data:** Researchers whose proposed use of the data has been approved.

**Types of analyses:** Data will be made available for scientific study only.

**Mechanisms of data availability:** Data will be made available after approval of a proposal for use and a signed data use agreement.
